# Supplementary material for: Evaluation of WRF Performance in Simulating an Extreme Precipitation Event over the South of Minas Gerais, Brazil
Source: MDPI journal article supplement (doi:10.3390/atmos14081276), 2023-08-12
Supplement: s1 [file s1]

Table S1 - Classification of intensity rain to Boa Esperança city to period study of  
December 2021, 31 to January 2022, 2.

| City - Boa Esperança |               |                 |             |                |                 |
|----------------------|---------------|-----------------|-------------|----------------|-----------------|
| Date                 | Observed Rain |                 | Experiments | Simulated Rain |                 |
|                      | Rate (mm/day) | Class           |             | Rate (mm/day)  | Class           |
| 2021/12/31           | 50.6          | Very Heavy Rain | BMJ         | 34.47          | Heavy Rain      |
|                      |               |                 | GD          | 0.62           | Light Rain      |
|                      |               |                 | GF          | 12.36          | Moderate Rain   |
|                      |               |                 | KF          | 0.25           | Light Rain      |
|                      |               |                 | NT          | 13.35          | Moderate Rain   |
| 2022/01/01           | 21.2          | Moderate Rain   | BMJ         | 1.75           | Light Rain      |
|                      |               |                 | GD          | 1.92           | Light Rain      |
|                      |               |                 | GF          | 2.38           | Light Rain      |
|                      |               |                 | KF          | 2.53           | Light Rain      |
|                      |               |                 | NT          | 6.86           | Light Rain      |
| 2022/01/02           | 23            | Moderate Rain   | BMJ         | 34.28          | Heavy Rain      |
|                      |               |                 | GD          | 39.44          | Heavy Rain      |
|                      |               |                 | GF          | 34.71          | Heavy Rain      |
|                      |               |                 | KF          | 48.24          | Heavy Rain      |
|                      |               |                 | NT          | 75.72          | Very Heavy Rain |

Table S2 - Classification of intensity rain to Camanducaia city to period study of  
December 2021, 31 to January 2022, 2.

| City - Camanducaia |               |            |             |                |               |
|--------------------|---------------|------------|-------------|----------------|---------------|
| Date               | Observed Rain |            | Experiments | Simulated Rain |               |
|                    | Rate (mm/day) | Class      |             | Rate (mm/day)  | Class         |
| 2021/12/31         | 39.6          | Heavy Rain | BMJ         | 11.23          | Moderate Rain |
|                    |               |            | GD          | 3.33           | Light Rain    |
|                    |               |            | GF          | 0.66           | Light Rain    |
|                    |               |            | KF          | 0.19           | Light Rain    |
|                    |               |            | NT          | 1.87           | Light Rain    |
| 2022/01/01         | 10.2          | Light Rain | BMJ         | 3.76           | Light Rain    |
|                    |               |            | GD          | 2.79           | Light Rain    |
|                    |               |            | GF          | 15.05          | Moderate Rain |
|                    |               |            | KF          | 7.31           | Light Rain    |
|                    |               |            | NT          | 13.54          | Moderate Rain |
| 2022/01/02         | 8.7           | Light Rain | BMJ         | 40.04          | Heavy Rain    |
|                    |               |            | GD          | 21.97          | Moderate Rain |
|                    |               |            | GF          | 28.94          | Moderate Rain |
|                    |               |            | KF          | 12.12          | Moderate Rain |
|                    |               |            | NT          | 17.37          | Moderate Rain |

Table S3 - Classification of intensity rain to Campos do Jordão city to period study of December 2021, 31 to January 2022, 2.

| City - Campos do Jordão |               |               |             |                |                 |
|-------------------------|---------------|---------------|-------------|----------------|-----------------|
| Date                    | Observed Rain |               | Experiments | Simulated Rain |                 |
|                         | Rate (mm/day) | Class         |             | Rate (mm/day)  | Class           |
| 2021/12/31              | 32.4          | Heavy Rain    | BMJ         | 9.6            | Light Rain      |
|                         |               |               | GD          | 4.98           | Light Rain      |
|                         |               |               | GF          | 5.43           | Light Rain      |
|                         |               |               | KF          | 0.73           | Light Rain      |
|                         |               |               | NT          | 1.73           | Light Rain      |
| 2022/01/01              | 21.2          | Moderate Rain | BMJ         | 31.55          | Heavy Rain      |
|                         |               |               | GD          | 24.33          | Moderate Rain   |
|                         |               |               | GF          | 17.54          | Moderate Rain   |
|                         |               |               | KF          | 35.24          | Heavy Rain      |
|                         |               |               | NT          | 24.09          | Moderate Rain   |
| 2022/01/02              | 15.4          | Moderate Rain | BMJ         | 46.56          | Heavy Rain      |
|                         |               |               | GD          | 39.35          | Heavy Rain      |
|                         |               |               | GF          | 55.9           | Very Heavy Rain |
|                         |               |               | KF          | 12.33          | Moderate Rain   |
|                         |               |               | NT          | 26.24          | Moderate Rain   |

Table S4 - Classification of intensity rain to Ipuíuna city to period study of December 2021, 31 to January 2022, 2.

| City - Ipuíuna |               |               |             |                |                 |
|----------------|---------------|---------------|-------------|----------------|-----------------|
| Date           | Observed Rain |               | Experiments | Simulated Rain |                 |
|                | Rate (mm/day) | Class         |             | Rate (mm/day)  | Class           |
| 2021/12/31     | 30.8          | Moderate Rain | BMJ         | 1.25           | Light Rain      |
|                |               |               | GD          | 4.41           | Light Rain      |
|                |               |               | GF          | 7.29           | Light Rain      |
|                |               |               | KF          | 0.94           | Light Rain      |
|                |               |               | NT          | 9.43           | Light Rain      |
| 2022/01/01     | 1.6           | Light Rain    | BMJ         | 17.66          | Moderate Rain   |
|                |               |               | GD          | 11.75          | Moderate Rain   |
|                |               |               | GF          | 16.4           | Moderate Rain   |
|                |               |               | KF          | 19.01          | Moderate Rain   |
|                |               |               | NT          | 3.37           | Light Rain      |
| 2022/01/02     | 28            | Moderate Rain | BMJ         | 51.69          | Heavy Rain      |
|                |               |               | GD          | 23.72          | Moderate Rain   |
|                |               |               | GF          | 35.85          | Heavy Rain      |
|                |               |               | KF          | 27.31          | Moderate Rain   |
|                |               |               | NT          | 58.97          | Very Heavy Rain |

Table S5 - Classification of intensity rain to Guaxupé city to period study of December 2021, 31 to January 2022, 2.

| City - Guaxupé |               |               |             |                |                 |
|----------------|---------------|---------------|-------------|----------------|-----------------|
| Date           | Observed Rain |               | Experiments | Simulated Rain |                 |
|                | Rate (mm/day) | Class         |             | Rate (mm/day)  | Class           |
| 2021/12/31     | 44.2          | Heavy Rain    | BMJ         | 14.07          | Moderate Rain   |
|                |               |               | GD          | 2.46           | Light Rain      |
|                |               |               | GF          | 1.57           | Light Rain      |
|                |               |               | KF          | 0.05           | Light Rain      |
|                |               |               | NT          | 3.85           | Light Rain      |
| 2022/01/01     | 4.8           | Light Rain    | BMJ         | 9.17           | Light Rain      |
|                |               |               | GD          | 18.65          | Moderate Rain   |
|                |               |               | GF          | 28.71          | Moderate Rain   |
|                |               |               | KF          | 4.48           | Light Rain      |
|                |               |               | NT          | 8.35           | Light Rain      |
| 2022/01/02     | 30.2          | Moderate Rain | BMJ         | 92.7           | Very Heavy Rain |
|                |               |               | GD          | 17.03          | Moderate Rain   |
|                |               |               | GF          | 14.02          | Moderate Rain   |
|                |               |               | KF          | 15.02          | Moderate Rain   |
|                |               |               | NT          | 20.89          | Moderate Rain   |

Table S6 - Classification of intensity rain to Itajubá city to period study of December 2021, 31 to January 2022, 2.

| City - Itajubá |               |            |             |                |                 |
|----------------|---------------|------------|-------------|----------------|-----------------|
| Date           | Observed Rain |            | Experiments | Simulated Rain |                 |
|                | Rate (mm/day) | Class      |             | Rate (mm/day)  | Class           |
| 2021/12/31     | 42.8          | Heavy Rain | BMJ         | 7.28           | Light Rain      |
|                |               |            | GD          | 8.34           | Light Rain      |
|                |               |            | GF          | 2.03           | Light Rain      |
|                |               |            | KF          | 6.55           | Light Rain      |
|                |               |            | NT          | 8.25           | Light Rain      |
| 2022/01/01     | 39.4          | Heavy Rain | BMJ         | 3.48           | Light Rain      |
|                |               |            | GD          | 1.88           | Light Rain      |
|                |               |            | GF          | 20.06          | Moderate Rain   |
|                |               |            | KF          | 0.38           | Light Rain      |
|                |               |            | NT          | 4.45           | Light Rain      |
| 2022/01/02     | 66            | Heavy Rain | BMJ         | 59.7           | Very Heavy Rain |
|                |               |            | GD          | 49.45          | Heavy Rain      |
|                |               |            | GF          | 52.12          | Very Heavy Rain |
|                |               |            | KF          | 24.34          | Moderate Rain   |
|                |               |            | NT          | 55.91          | Very Heavy Rain |

Table S7 - Classification of intensity rain to Passa Vinte city to period study of  
December 2021, 31 to January 2022, 2.

| City - Passa Vinte |               |                 |             |                |               |
|--------------------|---------------|-----------------|-------------|----------------|---------------|
| Date               | Observed Rain |                 | Experiments | Simulated Rain |               |
|                    | Rate (mm/day) | Class           |             | Rate (mm/day)  | Class         |
| 2021/12/31         | 13.4          | Moderate Rain   | BMJ         | 43.7           | Heavy Rain    |
|                    |               |                 | GD          | 2.2            | Light Rain    |
|                    |               |                 | GF          | 23.46          | Moderate Rain |
|                    |               |                 | KF          | 15.27          | Moderate Rain |
|                    |               |                 | NT          | 20.13          | Moderate Rain |
| 2022/01/01         | 56            | Very Heavy Rain | BMJ         | 40.73          | Heavy Rain    |
|                    |               |                 | GD          | 43.68          | Heavy Rain    |
|                    |               |                 | GF          | 35.95          | Heavy Rain    |
|                    |               |                 | KF          | 45.39          | Heavy Rain    |
|                    |               |                 | NT          | 36.48          | Heavy Rain    |
| 2022/01/02         | 11.4          | Moderate Rain   | BMJ         | 14.97          | Moderate Rain |
|                    |               |                 | GD          | 35.96          | Heavy Rain    |
|                    |               |                 | GF          | 18.1           | Moderate Rain |
|                    |               |                 | KF          | 16.16          | Moderate Rain |
|                    |               |                 | NT          | 18.43          | Moderate Rain |

Table S8 - Classification of intensity rain to Passos city to period study of December 2021, 31 to January 2022, 2.

| City - Passos |               |               |             |                |               |
|---------------|---------------|---------------|-------------|----------------|---------------|
| Date          | Observed Rain |               | Experiments | Simulated Rain |               |
|               | Rate (mm/day) | Class         |             | Rate (mm/day)  | Class         |
| 2021/12/31    | 24.6          | Moderate Rain | BMJ         | 9.35           | Light Rain    |
|               |               |               | GD          | 0.14           | Light Rain    |
|               |               |               | GF          | 3.43           | Light Rain    |
|               |               |               | KF          | 4.75           | Light Rain    |
|               |               |               | NT          | 9.43           | Light Rain    |
| 2022/01/01    | 25.8          | Moderate Rain | BMJ         | 1.6            | Light Rain    |
|               |               |               | GD          | 1.77           | Light Rain    |
|               |               |               | GF          | 3.47           | Light Rain    |
|               |               |               | KF          | 1              | Light Rain    |
|               |               |               | NT          | 5.13           | Light Rain    |
| 2022/01/02    | 0.4           | Light Rain    | BMJ         | 45.71          | Heavy Rain    |
|               |               |               | GD          | 13.91          | Moderate Rain |
|               |               |               | GF          | 32.73          | Heavy Rain    |
|               |               |               | KF          | 39.81          | Heavy Rain    |
|               |               |               | NT          | 18.08          | Moderate Rain |



Table S9 - Classification of intensity rain to Perdões city to period study of December 2021, 31 to January 2022, 2.

| City - Perdões |               |               |             |                |                 |
|----------------|---------------|---------------|-------------|----------------|-----------------|
| Date           | Observed Rain |               | Experiments | Simulated Rain |                 |
|                | Rate (mm/day) | Class         |             | Rate (mm/day)  | Class           |
| 2021/12/31     | 22.4          | Moderate Rain | BMJ         | 63.11          | Very Heavy Rain |
|                |               |               | GD          | 2.99           | Light Rain      |
|                |               |               | GF          | 16.64          | Moderate Rain   |
|                |               |               | KF          | 0.47           | Light Rain      |
|                |               |               | NT          | 35.69          | Heavy Rain      |
| 2022/01/01     | 15.6          | Moderate Rain | BMJ         | 7.14           | Light Rain      |
|                |               |               | GD          | 3.34           | Light Rain      |
|                |               |               | GF          | 6.8            | Light Rain      |
|                |               |               | KF          | 5.42           | Light Rain      |
|                |               |               | NT          | 22.76          | Moderate Rain   |
| 2022/01/02     | 17.0          | Moderate Rain | BMJ         | 18.97          | Moderate Rain   |
|                |               |               | GD          | 6.98           | Light Rain      |
|                |               |               | GF          | 17.26          | Moderate Rain   |
|                |               |               | KF          | 58.09          | Very Heavy Rain |
|                |               |               | NT          | 22.47          | Moderate Rain   |

Table S10 - Classification of intensity rain to Piquete city to period study of December 2021, 31 to January 2022, 2.

**City - Piquete**

| Date       | Observed Rain |               | Experiments | Simulated Rain |                 |
|------------|---------------|---------------|-------------|----------------|-----------------|
|            | Rate (mm/day) | Class         |             | Rate (mm/day)  | Class           |
| 2021/12/31 | 17.8          | Moderate Rain | BMJ         | 8.7            | Light Rain      |
|            |               |               | GD          | 11.67          | Moderate Rain   |
|            |               |               | GF          | 4.13           | Light Rain      |
|            |               |               | KF          | 0.36           | Light Rain      |
|            |               |               | NT          | 6.69           | Light Rain      |
| 2022/01/01 | 21.2          | Moderate Rain | BMJ         | 7.92           | Light Rain      |
|            |               |               | GD          | 3.94           | Light Rain      |
|            |               |               | GF          | 29.98          | Moderate Rain   |
|            |               |               | KF          | 10.18          | Light Rain      |
|            |               |               | NT          | 11.46          | Moderate Rain   |
| 2022/01/02 | 17.2          | Moderate Rain | BMJ         | 38.95          | Heavy Rain      |
|            |               |               | GD          | 53.3           | Very Heavy Rain |
|            |               |               | GF          | 38.56          | Heavy Rain      |
|            |               |               | KF          | 10.87          | Light Rain      |
|            |               |               | NT          | 51.39          | Very Heavy Rain |

Table S11 - Classification of intensity rain to Queluz city to period study of December 2021, 31 to January 2022, 2.

| City - Queluz |               |               |             |                |               |
|---------------|---------------|---------------|-------------|----------------|---------------|
| Date          | Observed Rain |               | Experiments | Simulated Rain |               |
|               | Rate (mm/day) | Class         |             | Rate (mm/day)  | Class         |
| 2021/12/31    | 10.4          | Light Rain    | BMJ         | 14.75          | Moderate Rain |
|               |               |               | GD          | 13.58          | Moderate Rain |
|               |               |               | GF          | 1.44           | Light Rain    |
|               |               |               | KF          | 0.01           | Light Rain    |
|               |               |               | NT          | 3.66           | Light Rain    |
| 2022/01/01    | 16.0          | Moderate Rain | BMJ         | 5.91           | Light Rain    |
|               |               |               | GD          | 2.27           | Light Rain    |
|               |               |               | GF          | 14.63          | Moderate Rain |
|               |               |               | KF          | 3.01           | Light Rain    |
|               |               |               | NT          | 7.99           | Light Rain    |
| 2022/01/02    | 7.0           | Light Rain    | BMJ         | 11.26          | Moderate Rain |
|               |               |               | GD          | 22.28          | Moderate Rain |
|               |               |               | GF          | 25.78          | Moderate Rain |
|               |               |               | KF          | 8.69           | Light Rain    |
|               |               |               | NT          | 39.11          | Heavy Rain    |
